# Supplementary material for: Development of a qualitative real-time RT-PCR assay for the detection of SARS-CoV-2: a guide and case study in setting up an emergency-use, laboratory-developed molecular microbiological assay
Source: HighWire-hosted journal article supplement (doi:10.1136/jclinpath-2020-207128), 2021-05-28
Supplement: jclinpath-2020-207128supp001_data_supplement.pdf [file jclinpath-2020-207128supp001_data_supplement.pdf]

# Supplemental Materials:

Supplemental Table 1: In silico cross-reactivity assessment of N1 and N2 primer pairs across a variety of common respiratory pathogens.

| Organism                                                    | Taxonomic ID | qPCR primer 2019 nCoV_N1<br>BLAST match | qPCR primer 2019 nCoV_N2<br>BLAST match |
|-------------------------------------------------------------|--------------|-----------------------------------------|-----------------------------------------|
| Coronavirus SARS-CoV-2, COVID-19                            | 2697049      | 100                                     | 100                                     |
| Coronavirus SARS-CoV                                        | 694009       | ≤79                                     | ≤79                                     |
| Coronavirus HKU1                                            | 290028       | ≤79                                     | ≤79                                     |
| Coronavirus NL63                                            | 277944       | ≤79                                     | ≤79                                     |
| Coronavirus 229E                                            | 11137        | ≤79                                     | ≤79                                     |
| Coronavirus OC43                                            | 31631        | ≤79                                     | ≤79                                     |
| Middle East respiratory syndrome-related coronavirus (MERS) | 1335626      | ≤79                                     | ≤79                                     |
| Adenovirus (e.g. C1 Ad.71)                                  | 10506        | ≤79                                     | ≤79                                     |
| Human Metapneumovirus (hMPV)                                | 162145       | ≤79                                     | ≤79                                     |
| Influenza A                                                 | 11320        | ≤79                                     | ≤79                                     |
| Influenza B                                                 | 11520        | ≤79                                     | ≤79                                     |
| Enterovirus (e.g., EV68)                                    | 12059        | ≤79                                     | ≤79                                     |
| Parainfluenza Virus 1 (Respirovirus 1)                      | 12730        | ≤79                                     | ≤79                                     |
| Parainfluenza Virus 2 (Rubulavirus 2)                       | 1979160      | ≤79                                     | ≤79                                     |
| Parainfluenza Virus 3 (Respirovirus 3)                      | 11216        | ≤79                                     | ≤79                                     |
| Parainfluenza Virus 4 (Rubulavirus 4)                       | 1979161      | ≤79                                     | ≤79                                     |
| RSV (Human orthopneumovirus)                                | 11250        | ≤79                                     | ≤79                                     |
| Rhinovirus A                                                | 147711       | ≤79                                     | ≤79                                     |
| Rhinovirus B                                                | 147712       | ≤79                                     | ≤79                                     |
| Rhinovirus C                                                | 463676       | ≤79                                     | ≤79                                     |
| <i>Chlamydia pneumoniae</i>                                 | 83558        | ≤79                                     | ≤79                                     |
| <i>Haemophilus influenzae</i>                               | 727          | ≤79                                     | ≤79                                     |
| <i>Legionella pneumophila</i>                               | 446          | ≤79                                     | ≤79                                     |
| <i>Mycobacterium tuberculosis</i>                           | 1773         | ≤79                                     | ≤79                                     |
| <i>Streptococcus pneumoniae</i>                             | 1313         | ≤79                                     | ≤79                                     |
| <i>Streptococcus pyogenes</i>                               | 1314         | ≤79                                     | ≤79                                     |
| <i>Bordetella pertussis</i>                                 | 520          | ≤79                                     | ≤79                                     |
| <i>Mycoplasma pneumoniae</i>                                | 2104         | ≤79                                     | ≤79                                     |
| <i>Pneumocystis jirovecii</i> (PJP)                         | 42068        | ≤79                                     | ≤79                                     |
| <i>Candida albicans</i>                                     | 5476         | ≤79                                     | ≤79                                     |
| <i>Pseudomonas aeruginosa</i>                               | 287          | ≤79                                     | ≤79                                     |
| <i>Staphylococcus epidermidis</i>                           | 1282         | ≤79                                     | ≤79                                     |
| <i>Streptococcus salivarius</i>                             | 1304         | ≤79                                     | ≤79                                     |

**Supplemental Table 2. PCR cycling conditions used by the CDC compared to the LDT PCR cycling conditions with a different thermocycler.** The CDC SARS-CoV-2 protocol used the ABI 7500FastDx and called for a 2-minute incubation with uracil-DNA N-glycosylase (UNG) at 25°C. The lowest programmable temperature of our instrument (cobas z480, Roche) was 37°C. Since the UNG is active over a relatively broad temperature range, we substituted the 2-minute UNG incubation at 25°C for a 5-minute incubation at ambient room temperature.

|                   | <b>CDC<br/>cycling conditions<br/>(ABI 7500FastDx)</b> |         | <b>LDT<br/>cycling conditions<br/>(Roche cobas z480)</b> |         |
|-------------------|--------------------------------------------------------|---------|----------------------------------------------------------|---------|
| UNG Incubation    | 25°C                                                   | 2 mins  | 20-23°C                                                  | 5 mins  |
| RT Incubation     | 50°C                                                   | 15 mins | 50°C                                                     | 15 mins |
| Enzyme Activation | 95°C                                                   | 2 mins  | 95°C                                                     | 2 mins  |
| Amplification     | 95°C                                                   | 3 secs  | 95°C                                                     | 3 secs  |
| (45 cycles)       | 55°C                                                   | 30 secs | 55°C                                                     | 30 secs |

**Appendix 1: Detailed description of discrepancy between CDC reported limit of detection and MGH limit of detection:**

Possible explanations include: (1) matrix differences (the CDC used a A549 lung adenocarcinoma cell line in UTM, compared to our use of pooled clinical samples); (2) possible quantitation differences and dilutional error stacking associated with our custom-made transcribed RNA stock; or (3) differences in PCR instrumentation and cycling speeds. We observed a slightly lower efficiency of the N2-detection reagents compared to the efficiency reported in the CDC package insert. We found an approximately four-cycle lag with the N2 primer set compared to the N1 set, while results from the CDC indicated that the difference should be closer to one cycle. A collaborating institution later revealed that the N2-set performance could be rescued by extending the melt time to 5-10 seconds on instruments not capable of fast cycling. Nevertheless, we proceeded under the expectation that the process and LOD differences would not be clinically significant.

Supplemental Table 3: Assay performance in COVID-negative samples and in-vitro assessment of cross-reactivity.

| COVID-negative Sample Number | Clinical results for additional respiratory pathogens | 2019 nCov_N1 Ct | 2019 nCov_N2 Ct | RNAse P Ct | Result   | MA DPH Result         | Concordance |
|------------------------------|-------------------------------------------------------|-----------------|-----------------|------------|----------|-----------------------|-------------|
| COVID-negative 1             | Negative <sup>1</sup>                                 | --              | --              | 24.67      | Negative |                       | Yes         |
| COVID-negative 2             | Negative <sup>1</sup>                                 | --              | --              | 22.77      | Negative |                       | Yes         |
| COVID-negative 3             | Negative <sup>1</sup>                                 | -- <sup>3</sup> | --              | 25.33      | Negative |                       | Yes         |
| COVID-negative 4             | Negative <sup>1</sup>                                 | --              | --              | 25.23      | Negative |                       | Yes         |
| COVID-negative 5             | Negative <sup>1</sup>                                 | --              | --              | 26.64      | Negative |                       | Yes         |
| COVID-negative 6             | Negative <sup>1</sup>                                 | --              | --              | 24.57      | Negative |                       | Yes         |
| COVID-negative 7             | Negative <sup>1</sup>                                 | --              | --              | 26.68      | Negative |                       | Yes         |
| COVID-negative 8             | Negative <sup>1</sup>                                 | --              | --              | 26.64      | Negative |                       | Yes         |
| COVID-negative 9             | Negative <sup>1</sup>                                 | --              | --              | 22.21      | Negative |                       | Yes         |
| COVID-negative 10            | Negative <sup>1</sup>                                 | --              | --              | 24.81      | Negative |                       | Yes         |
| COVID-negative 11            | Negative <sup>1</sup>                                 | --              | --              | 25.68      | Negative |                       | Yes         |
| COVID-negative 12            | Negative <sup>1</sup>                                 | --              | --              | 23.85      | Negative |                       | Yes         |
| COVID-negative 13            | Negative <sup>1</sup>                                 | --              | --              | 24.64      | Negative |                       | Yes         |
| COVID-negative 14            | Negative <sup>1</sup>                                 | --              | --              | 30.5       | Negative |                       | Yes         |
| COVID-negative 15            | Negative <sup>1</sup>                                 | --              | --              | 25.75      | Negative |                       | Yes         |
| COVID-negative 16            | Human Metapneumovirus                                 | --              | --              | 26.13      | Negative |                       | Yes         |
| COVID-negative 17            | Adenovirus, Coronavirus 229E                          | --              | --              | 27.34      | Negative |                       | Yes         |
| COVID-negative 18            | Adenovirus                                            | --              | --              | 25.96      | Negative |                       | Yes         |
| COVID-negative 19            | Adenovirus                                            | --              | --              | 27.3       | Negative |                       | Yes         |
| COVID-negative 20            | Parainfluenza Virus 3                                 | --              | --              | 27.99      | Negative |                       | Yes         |
| COVID-negative 21            | Parainfluenza Virus 3                                 | --              | --              | 23.84      | Negative |                       | Yes         |
| COVID-negative 22            | Parainfluenza Virus 2                                 | --              | --              | 32.95      | Negative |                       | Yes         |
| COVID-negative 23            | Respiratory Syncytial Virus                           | --              | --              | 24.84      | Negative |                       | Yes         |
| COVID-negative 24            | Respiratory Syncytial Virus                           | --              | --              | 23.22      | Negative |                       | Yes         |
| COVID-negative 25            | Influenza B                                           | --              | --              | 32.95      | Negative |                       | Yes         |
| COVID-negative 26            | Influenza B                                           | --              | --              | 24.12      | Negative |                       | Yes         |
| COVID-negative 27            | influenza A/H1-2009                                   | --              | --              | 22.41      | Negative |                       | Yes         |
| COVID-negative 28            | influenza A/H1-2010                                   | --              | --              | 24.93      | Negative |                       | Yes         |
| COVID-negative 29            | influenza A/H1-2011                                   | --              | --              | 29.53      | Negative |                       | Yes         |
| COVID-negative 30            | Negative <sup>2</sup>                                 | --              | --              | 23.99      | Negative | Negative <sup>4</sup> | Yes         |

<sup>1</sup> Negative by a multiplexed PCR for influenza A, influenza B, and RSV (Cepheid) and direct immunofluorescence antigen testing for adenovirus, human metapneumovirus, and parainfluenza types 1-3 (Light Diagnostics).

<sup>2</sup> Negative by a multiplexed PCR for influenza A, influenza B, and RSV (Cepheid).

<sup>3</sup> This nasopharyngeal specimen originally yielded a positive result (N1 Ct 34.93, no amplification with N2, and RNAse P Ct of 25.33). The same extracted RNA was re-tested in duplicate; one reaction also gave an N1 Ct of 34.88 and the second reaction did not have amplification of N1. A new aliquot of the original NP sample was obtained, re-extracted, and re-PCR'd, which had no amplification of N1 or N2, and an RNAse P Ct of 27.52. Thus, the sample was determined to be negative.

<sup>4</sup> A dedicated nasopharyngeal (NP) specimen and oropharyngeal (OP) specimen from this patient were sent to the State Lab for testing, where the NP specimen tested positive (N1 Ct of 32.05, N2 Ct of 31.40), and the OP specimen was negative. A different NP specimen collected on the same day (for flu/RSV testing) was tested by the in-house LDT assay and did not amplify with the N1 or N2 primer/probe sets, while the RNAse P Ct was 23.99. The same extracted RNA was re-tested in-house and again did not amplify with N1 or N2, while the RNAse P Ct was 24.79. Finally, the in-house NP specimen that consistently tested negative was sent to the State Lab for re-testing, and the State Lab also found that the specimen was negative for COVID-19. Thus, we believe there was a pre-analytic error, e.g. sample mislabeling, that led to an erroneous initial result of COVID-19 positivity.

1 Supplemental Table 4: Assay performance in COVID-positive clinical samples.

| COVID-positive Sample Number | Clinical results for additional respiratory pathogens | 2019 nCov_N1 Ct | 2019 nCov_N2 Ct | RNAse P Ct | Result   | MA DPH Result | Concordance |
|------------------------------|-------------------------------------------------------|-----------------|-----------------|------------|----------|---------------|-------------|
| COVID-positive 1             | Negative <sup>1</sup>                                 | 31.8            | 22.84           | 24.37      | Positive | Positive      | Yes         |
| COVID-positive 2             | Negative <sup>1</sup>                                 | 16.59           | 18.69           | 24.73      | Positive | Positive      | Yes         |
| COVID-positive 3             | Negative <sup>1</sup>                                 | 17.8            | 20.45           | 23.43      | Positive | Positive      | Yes         |
| COVID-positive 4             | Negative <sup>1</sup>                                 | 13.96           | 15.26           | 23.54      | Positive | Positive      | Yes         |
| COVID-positive 5             | Negative <sup>1</sup>                                 | 17.84           | 19.66           | 24.27      | Positive | Positive      | Yes         |
| COVID-positive 6             | Negative <sup>1</sup>                                 | 16.25           | 18.4            | 29.15      | Positive | Positive      | Yes         |
| COVID-positive 7             | Negative <sup>1</sup>                                 | 23.57           | 26.74           | 26.24      | Positive | Positive      | Yes         |
| COVID-positive 8             | Negative <sup>1</sup>                                 | 21.97           | 24.12           | 28.5       | Positive | Positive      | Yes         |
| COVID-positive 9             | Negative <sup>1</sup>                                 | 25.6            | 29.49           | 23.5       | Positive | Positive      | Yes         |
| COVID-positive 10            | Negative <sup>1</sup>                                 | 10.64           | 12.25           | 24.46      | Positive | Positive      | Yes         |
| COVID-positive 11            | Negative <sup>1</sup>                                 | 19.83           | 22.63           | 24.93      | Positive | Positive      | Yes         |
| COVID-positive 12            | Negative <sup>1</sup>                                 | 15.5            | 17.3            | 24.42      | Positive | Positive      | Yes         |
| COVID-positive 13            | Negative <sup>1</sup>                                 | 21.17           | 23.73           | 23.9       | Positive | Positive      | Yes         |
| COVID-positive 14            | Negative <sup>1</sup>                                 | 18.76           | 20.56           | 24.67      | Positive | Positive      | Yes         |
| COVID-positive 15            | Negative <sup>1</sup>                                 | 27.31           | 31.65           | 24.92      | Positive | Positive      | Yes         |
| COVID-positive 16            | Negative <sup>1</sup>                                 | 18.76           | 22.1            | 26.97      | Positive | Positive      | Yes         |
| COVID-positive 17            | Negative <sup>1</sup>                                 | 23.5            | 28.41           | 27.21      | Positive | Positive      | Yes         |
| COVID-positive 18            | Negative <sup>1</sup>                                 | 22.36           | 25.72           | 23.85      | Positive | Positive      | Yes         |
| COVID-positive 19            | Negative <sup>1</sup>                                 | 24.17           | 27.67           | 25.92      | Positive | Positive      | Yes         |
| COVID-positive 20            | Negative <sup>1</sup>                                 | 23.39           | 26.51           | 26.51      | Positive | Positive      | Yes         |
| COVID-positive 21            | Negative <sup>1</sup>                                 | 21.62           | 23.7            | 28.52      | Positive | Positive      | Yes         |
| COVID-positive 22            | Negative <sup>1</sup>                                 | 26.39           | 30.25           | 25.13      | Positive | Positive      | Yes         |
| COVID-positive 23            | Negative <sup>1</sup>                                 | 15.7            | 17.98           | 25.93      | Positive | Positive      | Yes         |
| COVID-positive 24            | Negative <sup>1</sup>                                 | 14.8            | 16.27           | 24.27      | Positive | Positive      | Yes         |
| COVID-positive 25            | Negative <sup>1</sup>                                 | 17.7            | 19.46           | 24.46      | Positive | Positive      | Yes         |
| COVID-positive 26            | Negative <sup>1</sup>                                 | 16.73           | 18.48           | 23.8       | Positive | Positive      | Yes         |
| COVID-positive 27            | Negative <sup>1</sup>                                 | 22.26           | 24.61           | 32.95      | Positive | Positive      | Yes         |
| COVID-positive 28            | Negative <sup>1</sup>                                 | 21.98           | 24.89           | 24.39      | Positive | Positive      | Yes         |
| COVID-positive 29            | Negative <sup>1</sup>                                 | 14.55           | 17.08           | 25.11      | Positive | Positive      | Yes         |
| COVID-positive 30            | Negative <sup>1</sup>                                 | 19.51           | 22.25           | 22.51      | Positive | Positive      | Yes         |

<sup>1</sup> Negative by a multiplexed PCR for influenza A, influenza B, and RSV (Cepheid).

2
